# Supplementary material for: Violent crime and socioeconomic deprivation in shaping asthma-related pollution susceptibility: a case-crossover design
Source: PubMed Central journal article supplement — J Epidemiol Community Health. 2019 Jul 9;73(9):846–53. doi: 10.1136/jech-2018-211816 (PMC6820152; doi:10.1136/jech-2018-211816), 2019-07-09
Supplement: jech-2018-211816supp001.pdf [file jech-2018-211816supp001.pdf]

**Table Supp 1**

Model results of day- and residence-specific ozone and risk of ED visit for asthma, by quartile of community socioeconomic deprivation (by police precinct), 2005-2011, in NYC.

| Quartile | Lag  | Beta.10ppb | LCL   | UCL  | P-value  |
|----------|------|------------|-------|------|----------|
| Q0       | Lag0 | 2.1        | -3    | 7.6  | 0.46005  |
|          | lag1 | 5.8        | 0.4   | 11.5 | 0.041354 |
|          | lag2 | 8.1        | 2.8   | 13.8 | 0.001843 |
|          | lag3 | 7.6        | 2.4   | 13.2 | 0.001912 |
|          | lag4 | 1.2        | -3.7  | 6.3  | 0.575085 |
|          | lag5 | 2.6        | -2.4  | 7.8  | 0.286154 |
|          | lag6 | 1.6        | -3.3  | 6.8  | 0.417636 |
| Q1       | Lag0 | 4.2        | -4.2  | 13.3 | 0.401616 |
|          | lag1 | 14         | 3.9   | 25   | 0.018318 |
|          | lag2 | 17.2       | 9     | 26   | 0.003134 |
|          | lag3 | 14.1       | 5.9   | 22.9 | 0.024336 |
|          | lag4 | 5.7        | -1.8  | 13.7 | 0.095506 |
|          | lag5 | 7          | -1.1  | 15.7 | 0.141566 |
|          | lag6 | 3.5        | -4.2  | 11.8 | 0.567501 |
| Q2       | Lag0 | 5.7        | -2.4  | 14.4 | 0.11895  |
|          | lag1 | 12.3       | 3.2   | 22.2 | 0.023698 |
|          | lag2 | 18.6       | 9.6   | 28.3 | 0.000888 |
|          | lag3 | 17.6       | 8.4   | 27.6 | 0.0045   |
|          | lag4 | 11.5       | 2.9   | 20.9 | 0.00388  |
|          | lag5 | 10.5       | 2.5   | 19.1 | 0.00325  |
|          | lag6 | 7.3        | 0.7   | 14.4 | 0.040098 |
| Q3       | Lag0 | 4.9        | -4.1  | 14.9 | 0.359409 |
|          | lag1 | 16.3       | 6.9   | 26.6 | 0.000158 |
|          | lag2 | 21         | 10.5  | 32.5 | 0.000805 |
|          | lag3 | 18.4       | 9.2   | 28.3 | 0.002403 |
|          | lag4 | 5.4        | -3    | 14.6 | 0.251168 |
|          | lag5 | -0.7       | -10.4 | 10   | 0.471636 |
|          | lag6 | 0.5        | -7.4  | 9    | 0.745471 |

**Table Supp 2**

Model results of day- and residence-specific ozone and risk of ED visit for asthma, by quartile of community violent crime (by police precinct), 2005 – 2011, in NYC.

| Quartile | Lag  | Beta.10ppb | LCL  | UCL  | P-value  |
|----------|------|------------|------|------|----------|
| Q0       | Lag0 | 6.5        | 1.2  | 12.1 | 0.031402 |
|          | lag1 | 6          | 0.6  | 11.6 | 0.015274 |
|          | lag2 | 6.2        | 1    | 11.7 | 0.009921 |
|          | lag3 | 7          | 1.9  | 12.4 | 0.015044 |
|          | lag4 | 3.7        | -1.3 | 8.9  | 0.114577 |
|          | lag5 | 6.2        | 1.1  | 11.6 | 0.015984 |
|          | lag6 | 2.8        | -2.1 | 7.9  | 0.218146 |
| Q1       | Lag0 | 6.2        | -1.6 | 14.7 | 0.884369 |
|          | lag1 | 11.8       | 2.8  | 21.6 | 0.069326 |
|          | lag2 | 15.4       | 6.8  | 24.7 | 0.002722 |
|          | lag3 | 13         | 5    | 21.7 | 0.021027 |
|          | lag4 | 8.1        | 0    | 16.8 | 0.166334 |
|          | lag5 | 7.6        | -1.7 | 17.7 | 0.722792 |
|          | lag6 | 5.7        | -2.1 | 14.1 | 0.329041 |
| Q2       | Lag0 | 7.7        | -0.8 | 16.9 | 0.658625 |
|          | lag1 | 15.5       | 6.7  | 25.1 | 0.002244 |
|          | lag2 | 19.3       | 10.9 | 28.4 | 2.65E-05 |
|          | lag3 | 20         | 10.2 | 30.6 | 0.000373 |
|          | lag4 | 10.7       | 2.4  | 19.8 | 0.027274 |
|          | lag5 | 10.4       | 2.8  | 18.6 | 0.107816 |
|          | lag6 | 4.7        | -2.2 | 12   | 0.444517 |
| Q3       | Lag0 | 9.3        | 0.4  | 19.1 | 0.326063 |
|          | lag1 | 15.9       | 7.1  | 25.4 | 0.000287 |
|          | lag2 | 18.2       | 8.5  | 28.9 | 0.000831 |
|          | lag3 | 16.2       | 6.5  | 26.7 | 0.009734 |
|          | lag4 | 9.2        | -0.5 | 19.8 | 0.19452  |
|          | lag5 | 5.8        | -5.2 | 18   | 0.933418 |
|          | lag6 | 3.3        | -5.3 | 12.8 | 0.891524 |

**Table Supp 3**

Model results of day- and residence-specific ozone by cross-stratified, median-dichotomized violent crime and socioeconomic deprivation interaction on childhood asthma ED visit risk, 2005-2011, in NYC.

| <b>Cross-stratification</b>    | <b>Lag</b> | <b>Beta.10ppb</b> | <b>LCL</b> | <b>UCL</b> | <b>P-value</b> |
|--------------------------------|------------|-------------------|------------|------------|----------------|
| Crime and deprivation < median | Lag0       | 3.6               | -0.8       | 8.3        | 0.112647       |
|                                | lag1       | 5                 | 0.4        | 9.7        | 0.045577       |
|                                | lag2       | 6.4               | 2          | 10.9       | 0.002716       |
|                                | lag3       | 6.8               | 2.5        | 11.3       | 0.001692       |
|                                | lag4       | 2.3               | -1.8       | 6.5        | 0.205797       |
|                                | lag5       | 3.6               | -0.5       | 8          | 0.101884       |
|                                | lag6       | 1.4               | -2.6       | 5.7        | 0.47758        |
| Low crime: High deprivation    | Lag0       | 5.6               | -3.1       | 15.1       | 0.553496       |
|                                | lag1       | 13.6              | 5.2        | 22.6       | 0.002491       |
|                                | lag2       | 17.9              | 8.3        | 28.5       | 0.002539       |
|                                | lag3       | 12                | 2.7        | 22.3       | 0.202555       |
|                                | lag4       | 11.7              | 1.8        | 22.5       | 0.035127       |
|                                | lag5       | 8.1               | -3.6       | 21.2       | 0.412792       |
|                                | lag6       | 8.7               | 0.6        | 17.4       | 0.028906       |
| High crime: Low deprivation    | Lag0       | 0.5               | -7.4       | 9.2        | 0.29239        |
|                                | lag1       | 19.1              | 6.9        | 32.8       | 0.004751       |
|                                | lag2       | 22.9              | 13.4       | 33.1       | 1.67E-05       |
|                                | lag3       | 14.3              | 4.9        | 24.5       | 0.054526       |
|                                | lag4       | 6.6               | -3.3       | 17.6       | 0.336531       |
|                                | lag5       | 6.3               | -2.2       | 15.5       | 0.440882       |
|                                | lag6       | 4.3               | -6         | 15.7       | 0.556649       |
| Crime and deprivation > median | Lag0       | 7.2               | 0.4        | 14.5       | 0.094689       |
|                                | lag1       | 13.3              | 4.9        | 22.4       | 0.000448       |
|                                | lag2       | 17.8              | 9.2        | 27.1       | 0.000214       |
|                                | lag3       | 18.9              | 10.6       | 27.8       | 0.000127       |
|                                | lag4       | 9                 | 1.2        | 17.5       | 0.043324       |
|                                | lag5       | 5.2               | -3.4       | 14.6       | 0.671471       |
|                                | lag6       | 2.1               | -4.7       | 9.4        | 0.811325       |
